# Supplementary material
Source: MDPI journal article supplement (https://www.mdpi.com/1424-8247/16/2/245)
Supplement: s1 [file s1]

Table S1

|                         | Parent Ion,<br><i>m/z</i> | Product Ion, <i>m/z</i> (Collision<br>Energy, <i>eV</i> ) |
|-------------------------|---------------------------|-----------------------------------------------------------|
| <i>Polyphenolics</i>    |                           |                                                           |
| Aesculin                | 339.080                   | 133.09(44); 177.06(25)                                    |
| Chlorogenic acid        | 353.103                   | 191.28(25)                                                |
| Aesculetin              | 176.992                   | 150.25(20); 133.28(19)                                    |
| Caffeic acid            | 179.004                   | 134.00(13); 135.00(16)                                    |
| Rutin                   | 609.197                   | 299.98(42); 301.20(32)                                    |
| <i>p</i> -Coumaric acid | 163.031                   | 93.12(39); 119.09(16)                                     |
| Naringin                | 579.241                   | 151.42(43); 217.26(33)                                    |
| Astragalin              | 447.008                   | 284.03(29); 255.03(43)                                    |
| Rosmarinic acid         | 359.061                   | 133.03(43); 161.00(21)                                    |
| Aromadetrin             | 287.009                   | 269.00(15); 259.00(30)                                    |
| Eriodictyol             | 286.974                   | 135.02(22); 150.93(19)                                    |
| Luteolin                | 285.035                   | 133.06(36); 151.03(28)                                    |
| Quercetin               | 301.026                   | 151.01(22); 179.00(20)                                    |
| Naringenin              | 271.036                   | 151.01(20); 107.07(26)                                    |
| Isorhamnetin            | 315.040                   | 300.03(30); 151.02(20)                                    |
| <i>Iridoids</i>         |                           |                                                           |
| Loganic acid            | 374.620                   | 212.85(20); 168.84(20)                                    |
| Swertiamarin + HCOOH    | 419.000                   | 178.94(20); 118.79(20)                                    |
| Gentiopicrin + HCOOH    | 401.000                   | 179.05(20); 148.77(20)                                    |
| Sweroside + HCOOH       | 403.000                   | 194.70(20); 125.00(20)                                    |
